# Supplementary figures and images for: Assembling Magnetic Nanoparticles on Nanomechanical Resonators for Torque Magnetometry
Source: MDPI journal article supplement (doi:10.3390/ijms21030984), 2020-02-02

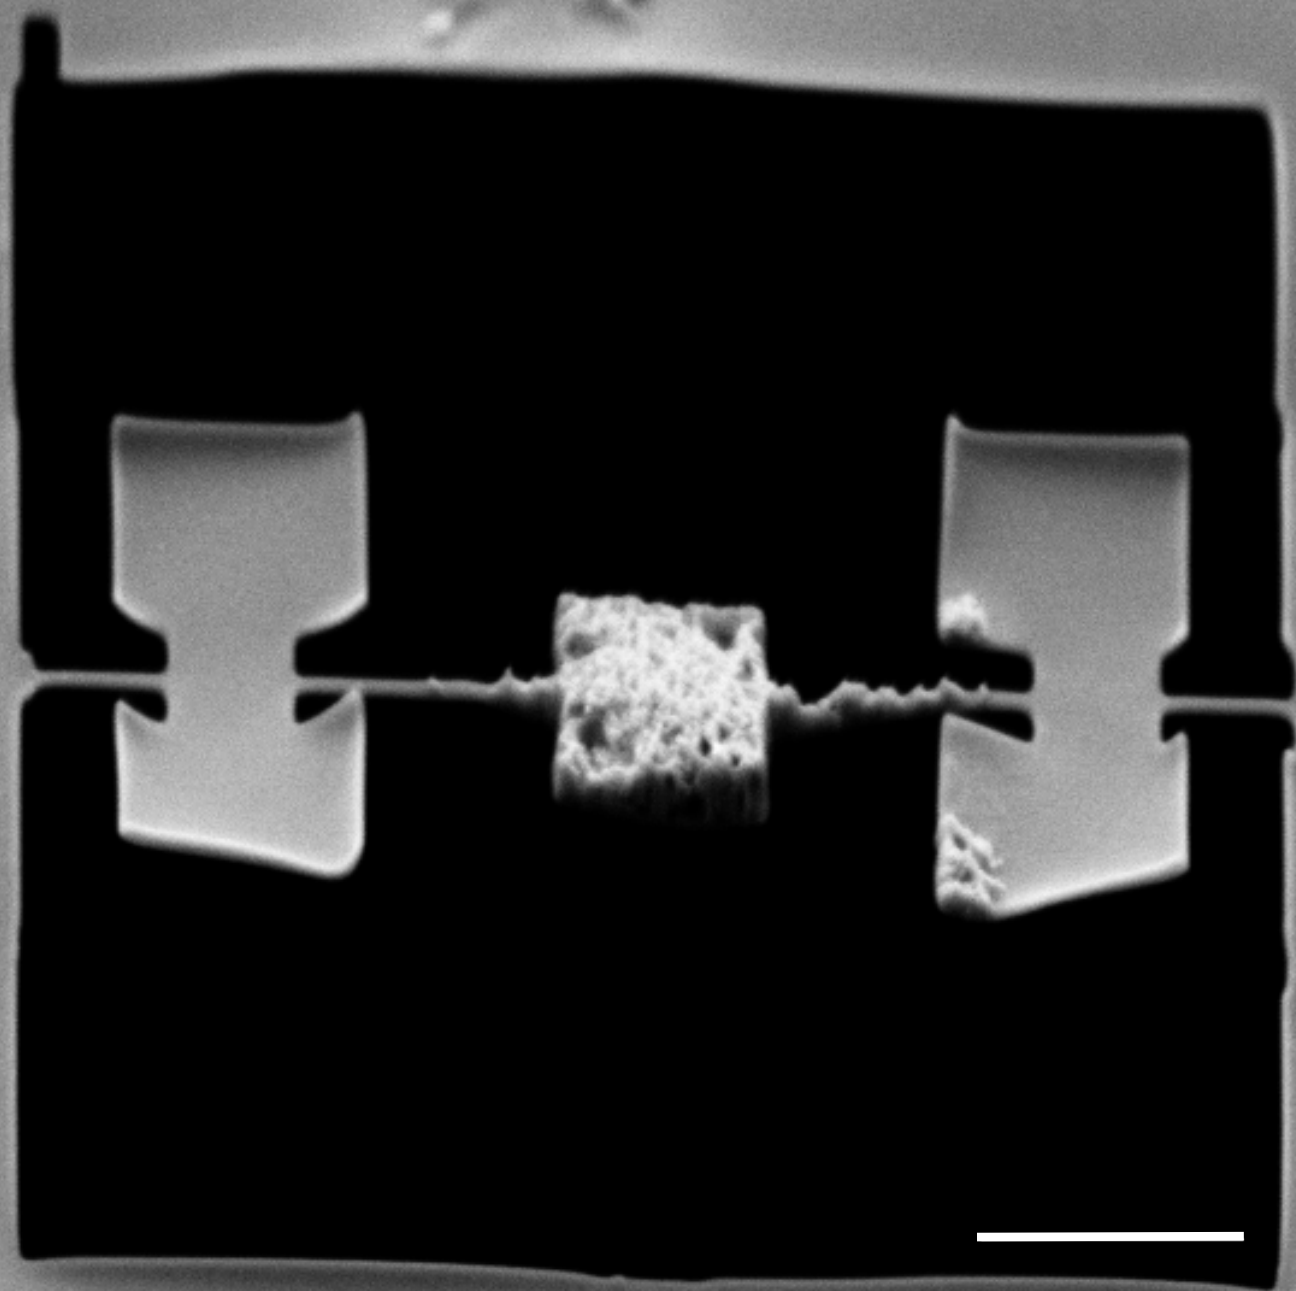

Supplement: s1 [file s1]

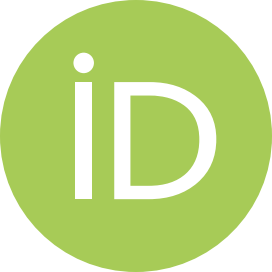

Supplement: s1 [file s1]

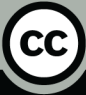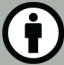

BY

Supplement: s1 [file s1]

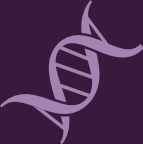

# International Journal of *Molecular Sciences*

Supplement: s1 [file s1]

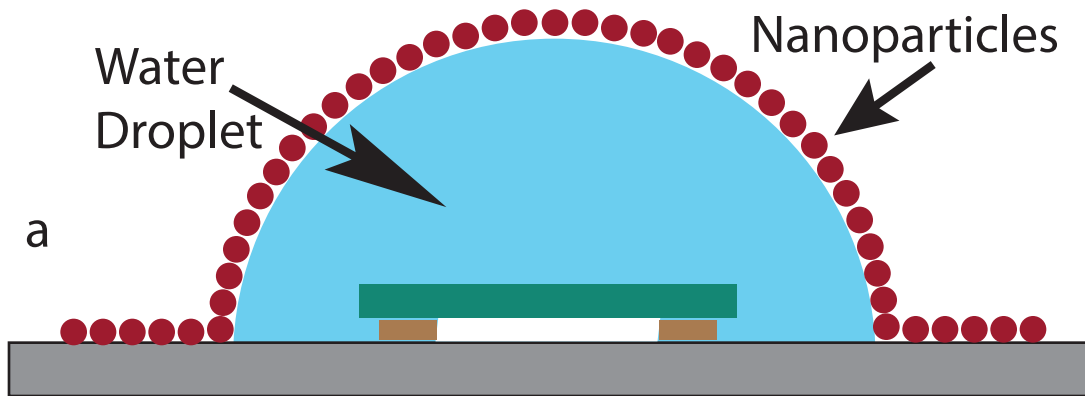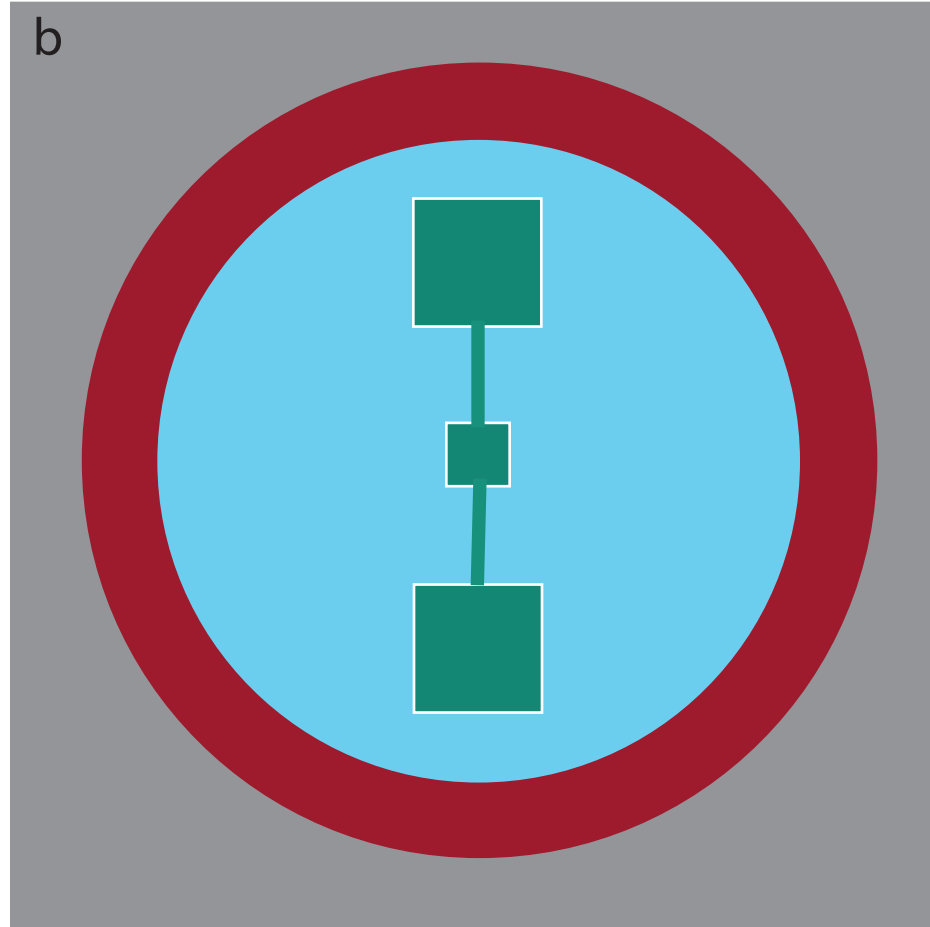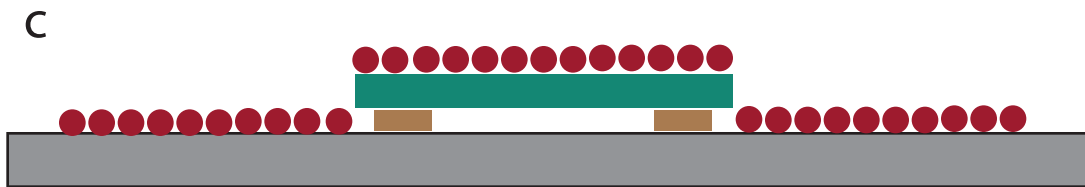

Supplement: s1 [file s1]
